# Supplementary material for: Early-life influenza A (H1N1) infection independently programs brain connectivity, HPA AXIS and tissue-specific gene expression profiles
Source: PubMed Central journal article supplement (PMC10928197; doi:10.1038/s41598-024-56601-5), 2024-03-11
Supplement: 41598_2024_56601_MOESM1_ESM.pdf [file 41598_2024_56601_MOESM1_ESM.pdf]

# Early-life Influenza A (H1N1) infection independently programs brain connectivity, HPA axis and tissue-specific gene expression profiles

Myriam P. Merz<sup>1,2,†</sup>, Snehaa V. Seal<sup>1,2</sup>, Nathalie Grova<sup>1,3</sup>, Sophie Meriaux<sup>1</sup>, Pauline Guebels<sup>1</sup>, Georgia Kanli<sup>4,5</sup>, Elise Mommaerts<sup>6</sup>, Nathalie Nicot<sup>6</sup>, Tony Kaoma<sup>7</sup>, Olivier Keunen<sup>4,5</sup>, Petr V. Nazarov<sup>7,8</sup>, Jonathan D. Turner<sup>1,\*</sup>

<sup>1</sup> Immune Endocrine and Epigenetics Research group, Department of Infection and Immunity, Luxembourg Institute of Health (LIH), 29 rue Henri Koch, 4354 Esch-sur-Alzette, Luxembourg

<sup>2</sup> Faculty of Science, Technology and Medicine, University of Luxembourg, 2 avenue de Université, L-4365 Esch-sur-Alzette, Luxembourg

<sup>3</sup> Université de Lorraine, Inserm U1256, NGERE, Nutrition-Génétique et Exposition aux Risques Environnementaux - 54000 Nancy, France

<sup>4</sup> In vivo Imaging Platform, Luxembourg Institute of Health, 1445 Strassen, Luxembourg

<sup>5</sup> Translational Radiomics, Department of Cancer Research, Luxembourg Institute of Health, 1526 Luxembourg, Luxembourg

<sup>6</sup> LuxGen Genome Center, Luxembourg Institute of Health, Laboratoire National de Santé 3555 Dudelange, Luxembourg

<sup>7</sup> Bioinformatics Platform, Data Integration and Analysis Unit, Luxembourg Institute of Health, 1445 Strassen, Luxembourg

<sup>8</sup> Multiomics Data Science Research group, Department of Cancer Research, Luxembourg Institute of Health, 1445 Strassen, Luxembourg

Supplementary Data

**Supplementary Data 1: PCR quantification of IAV (H1N1)** RNA extracted from homogenised mouse lungs was reverse transcribed using SuperScript 3 and H1N1 was amplified using the protocol of Spackman et al (Reference 89). H1N1 was not detected in any of the animals an PND 56. Ct values are given, and NA represents samples for which no amplification was observed.

| mouse_ID | Ct    | PCR_plate | note       | DOB        | generation | PND14_date | PND14_treatment | PND56_date | PND56_treatment | sex |
|----------|-------|-----------|------------|------------|------------|------------|-----------------|------------|-----------------|-----|
| 5147     | 20.36 | 1         | posControl | 20/09/2019 | F1         | 04/10/2019 | Sal             | 21/11/2019 | H1N1            | f   |
| 3009     | 23.94 | 2         | posControl | 11/09/2018 | F1         | 25/09/2018 | Sal             | 06/11/2018 | H1N1            | m   |
| 3011     | 34.28 | 2         | posControl | 11/09/2018 | F1         | 25/09/2018 | Sal             | 06/11/2018 | H1N1            | f   |
| 3007     | 35.52 | 3         | posControl | 11/09/2018 | F1         | 25/09/2018 | Sal             | 06/11/2018 | H1N1            | m   |
| 5152     | NA    | 2         | posControl | 20/09/2019 | F1         | 04/10/2019 | Sal             | 21/11/2019 | H1N1            | m   |
| 3001     | NA    | 1         | NA         | 05/09/2018 | F1         | 19/09/2018 | Sal             | 31/10/2018 | Sal             | m   |
| 4042     | NA    | 1         | NA         | 25/02/2019 | F1         | 11/03/2019 | Sal             | 22/04/2019 | Sal             | f   |
| 4048     | NA    | 3         | NA         | 26/02/2019 | F1         | 12/03/2019 | Sal             | 23/04/2019 | Sal             | m   |
| 5184     | NA    | 2         | NA         | 26/10/2019 | F1         | 09/11/2019 | Sal             | 14/12/2019 | Sal             | m   |
| 6036     | NA    | 1         | NA         | 11/01/2020 | F1         | 25/01/2020 | Sal             | 07/03/2020 | Sal             | f   |
| 6039     | NA    | 3         | NA         | 11/01/2020 | F1         | 25/01/2020 | Sal             | 07/03/2020 | Sal             | f   |
| 6062     | NA    | 2         | NA         | 16/02/2020 | F1         | 02/03/2020 | H1N1            | 12/04/2020 | Sal             | f   |
| 3013     | NA    | 1         | NA         | 14/09/2018 | F1         | 28/09/2018 | H1N1            | 09/11/2018 | Sal             | f   |
| 3015     | NA    | 1         | NA         | 14/09/2018 | F1         | 28/09/2018 | H1N1            | 09/11/2018 | Sal             | m   |
| 4002     | NA    | 1         | NA         | 09/02/2019 | F1         | 23/02/2019 | H1N1            | 05/04/2019 | Sal             | m   |
| 4007     | NA    | 1         | NA         | 12/02/2019 | F1         | 26/02/2019 | H1N1            | 11/04/2019 | Sal             | f   |



### Data 3: Microarray Immune infiltration

**Deconvolution:** In order to check for the presence of specific cellular populations and processes, we applied consensus independent component analysis (consICA) (Nazarov et al., 2019). It was already shown that the method successfully identifies variable cell subtypes and cellular processes in bulk-sample transcriptomics data, especially linked to immune and proliferative cells (Nazarov et al., 2019, Golebiewska et al., 2020). The method was applied as described in (Nazarov et al., 2019) directly on the dataset, thus avoiding using of a reference data. Number of independent components was fixed to 20.

**Results:** Our deconvolution of the data set result in tissue-specific processes (e.g. xenobiotic metabolic process for liver, FDR=1e-22, regulation of synaptic plasticity, FDR=9e-8, for cerebellum) but did not detect any immune signal. This suggests no significant effect of the treatment on immune response in the considered organs.

| TISSUE                                  | PROCESS                              | FDR   |
|-----------------------------------------|--------------------------------------|-------|
| sub-cortical                            | chemical synaptic transmission       | 2e-27 |
| cerebellum                              | regulation of synaptic plasticity    | 3e-08 |
| sub-cortical, cerebellum,<br>brain stem | chemical synaptic transmission       | 2e-27 |
| liver                                   | xenobiotic metabolic process         | 7e-25 |
| liver                                   | exogenous drug catabolic process     | 2e-24 |
| adrenal gland                           | fatty acid metabolic process         | 6e-14 |
| adrenal gland                           | steroid hormone biosynthetic process | 5e-03 |

**Data 4:** Scoring system for IAV sickness symptoms. Template from (Koch et al., 2016) with modifications.

| Feature           | Symptoms                                                                   | points                                     | Day1 | Day2 | Day3 | Day ... |
|-------------------|----------------------------------------------------------------------------|--------------------------------------------|------|------|------|---------|
| Appearance        | Normal (smooth coat, clear eyes/nose)                                      | 0                                          |      |      |      |         |
|                   | Hunched and/or fluffed                                                     | 1                                          |      |      |      |         |
|                   | Ocular discharge and/or edema                                              | 3                                          |      |      |      |         |
|                   | Pale, white mucus membranes/skin                                           | 6                                          |      |      |      |         |
|                   | Blue mucus membranes/skin (cyanosis)                                       | 12                                         |      |      |      |         |
| Respiratory rate  | Normal breathing                                                           | 0                                          |      |      |      |         |
|                   | Increased breathing ( <i>subjective</i> recognition by experimenter)       | 3                                          |      |      |      |         |
|                   | Increased breathing ( <i>obvious</i> ; double normal rate, rapid, shallow) | 6                                          |      |      |      |         |
|                   | Abdominal breathing (+/-gaspings or open mouth breathing)                  | 12                                         |      |      |      |         |
| General behavior  | Normal (based in baseline observations)                                    | 0                                          |      |      |      |         |
|                   | Decreased mobility                                                         | 2                                          |      |      |      |         |
|                   | Ataxia, wobbly, weak                                                       | 6                                          |      |      |      |         |
|                   | Inability to stand                                                         | 12                                         |      |      |      |         |
| Provoked behavior | Normal (moves when cage is disturbed, runs from hand)                      | 0                                          |      |      |      |         |
|                   | Subdued; responds to stimulation (moves away briskly)                      | 1                                          |      |      |      |         |
|                   | Subdued even to stimulation (moves away slowly)                            | 3                                          |      |      |      |         |
|                   | Unresponsive to gentle prodding                                            | 6                                          |      |      |      |         |
|                   | Does not right when placed on side within 5 seconds                        | 12                                         |      |      |      |         |
|                   |                                                                            | <b>Weight (in grams):</b>                  |      |      |      |         |
|                   |                                                                            | <b>% loss (compared to day 1):</b>         |      |      |      |         |
| Weight loss       | < 10%                                                                      | 0                                          |      |      |      |         |
|                   | 10-15%                                                                     | 2                                          |      |      |      |         |
|                   | 15-20%                                                                     | 6                                          |      |      |      |         |
|                   | 20-25%                                                                     | 10                                         |      |      |      |         |
|                   | ≥25%                                                                       | 12                                         |      |      |      |         |
|                   |                                                                            | <b>Total Score:</b>                        |      |      |      |         |
|                   |                                                                            | <b>Notes:</b>                              |      |      |      |         |
|                   |                                                                            | <b>Initials of experimenter/caretaker:</b> |      |      |      |         |

| Score | Interpretation                                                                                                        |
|-------|-----------------------------------------------------------------------------------------------------------------------|
| < 6   | Normal                                                                                                                |
| 6–11  | Morbid: Monitor at least 3 times per day; notify appropriate personnel immediately                                    |
| ≥ 12  | Moribund: Notify responsible personnel immediately<br>If any single criterion is 12 or higher = euthanize immediately |

**Data 5:** LD50 morbidity and mortality

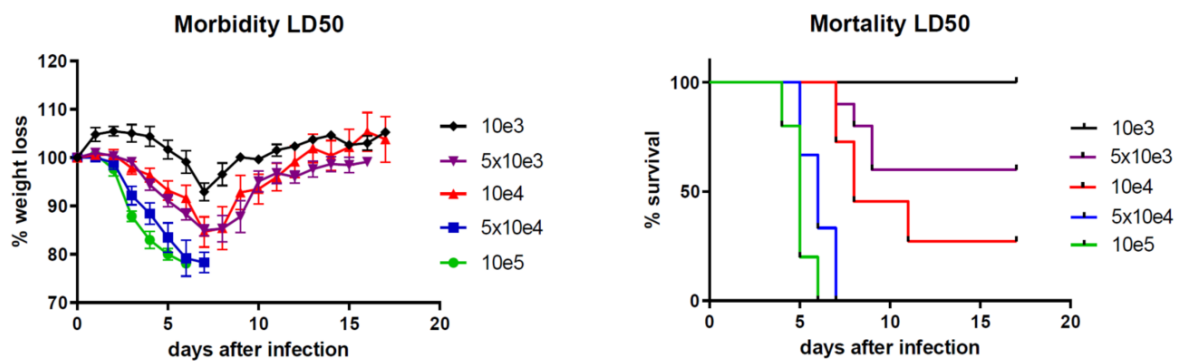

**Data 6.** MRI scan protocol. SR: Spatial Resolution, SI: Number of Slices, TE: Echo Time, TR: Repetition Time, ET: Echo Train, AVG: Number of Averages, SD: Scan Duration, NOB: number of b-value, NOD: number of diffusion direction.

| <b>SEQUENCE</b>   | <b>PURPOSE</b>                                                             | <b>PARAMETERS</b>                                                                                                                                               |
|-------------------|----------------------------------------------------------------------------|-----------------------------------------------------------------------------------------------------------------------------------------------------------------|
| <b>SE-DTI</b>     | Mapping of Fractional Anisotropy (FA)/ preferential direction of diffusion | <b>SR:</b> 0.16 × 0.16 × 1 mm; <b>SI:</b> 20; <b>TE\TR:</b> 22\800 ms; <b>AVG:</b> 5; <b>NOB:</b> 1; <b>b-value:</b> 1000; <b>NOD:</b> 7; <b>SD:</b> 49min44sec |
| <b>μMRI - FSE</b> | High resolution anatomy                                                    | <b>SR:</b> 0.08 × 0.08 × 0.2 mm ; <b>SI:</b> 64 ; <b>TE\TR:</b> 17\3000 ms; <b>ET:</b> 8; <b>AVG:</b> 2; <b>SD:</b> 3h31min42sec                                |
